# Supplementary material for: A visible-light responsive metal–organic framework as an eco-friendly photocatalyst under ambient air at room temperature
Source: Royal Society of Chemistry journal article supplement (doi:10.1039/d0qi00590h), 2020-01-01

Supporting Information for

**Visible-light Responsive Metal-Organic Framework as an Eco-friendly  
Photocatalyst under Ambient Air at Room Temperature**

Yanhong Liu,<sup>a</sup> Chen Lin,<sup>a</sup> Bowen Li,<sup>a</sup> Jian Wang,<sup>\*a</sup> Man Wang,<sup>a</sup> Na Zhang,<sup>a</sup> Yue Feng<sup>a</sup> and Pengyan Wu<sup>\*a</sup>

<sup>a</sup>School of Chemistry and Materials Science, Jiangsu Normal University, Xuzhou, Jiangsu, 221116, China.

\*Corresponding authors. E-mail: [wjian@jsnu.edu.cn](mailto:wjian@jsnu.edu.cn); [wpyan@jsnu.edu.cn](mailto:wpyan@jsnu.edu.cn)

## 1. X-ray Crystallography (Single-crystal diffraction) and Characterizations of Co–DCFB.

### 1.1 Crystal data of Co–DCFB:

$C_{30}H_{17}Cl_2N_2O_{5.5}Co_{0.5}$ , Mr = 593.82, Monoclinic, space group  $C2/c$ ,  $a = 23.022(3)$ ,  $b = 11.4407(14)$ ,  $c = 22.436(3)$  Å,  $\alpha = 90.00$ ,  $\beta = 104.889(2)$ ,  $\gamma = 90.00$ ,  $V = 5710.9(12)$  Å<sup>3</sup>,  $Z = 8$ ,  $D_c = 1.381$  g cm<sup>-3</sup>,  $\mu(\text{Mo-K}\alpha) = 0.551$  mm<sup>-1</sup>,  $T = 200(2)$  K. 3954 unique reflections [ $R_{\text{int}} = 0.1108$ ]. Final  $R_I$ [with  $I > 2\sigma(I)$ ] = 0.0613,  $wR_2(\text{all data}) = 0.1773$ , GOOF = 1.010. CCDC number: 1884820.

### 1.2 Crystallography:

Intensities were collected on a Bruker SMART APEX CCD diffractometer with graphite-monochromated Mo-K $\alpha$  ( $\lambda = 0.71073$  Å) using the SMART and SAINT programs. The structure was solved by direct methods and refined on  $F^2$  by full-matrix least-squares methods with SHELXTL version 5.1. Non-hydrogen atoms of the ligand backbones were refined anisotropically. Hydrogen atoms within the ligand backbones were fixed geometrically at calculated positions and allowed to ride on the parent non-hydrogen atoms.

### 1.3 Selective bond distance (Å) and angle (°) in Co–DCFB.

|                   |            |                  |          |
|-------------------|------------|------------------|----------|
| Co(1)–O(5)        | 2.106(2)   | Co(1)–N(1)       | 2.121(3) |
| Co(1)–O(5A)       | 2.106(2)   | Co(1)–N(1A)      | 2.121(3) |
| Co(1)–N(2)        | 2.151(4)   | Co(1)–N(3B)      | 2.204(4) |
| O(5)–Co(1)–O(5A)  | 173.78(12) | O(5)–Co(1)–N(1)  | 93.18(9) |
| O(5A)–Co(1)–N(1)  | 86.53(9)   | O(5)–Co(1)–N(1A) | 86.53(9) |
| O(5A)–Co(1)–N(1A) | 93.17(9)   | O(5A)–Co(1)–N(2) | 93.11(6) |
| N(1)–Co(1)–N(1A)  | 174.58(14) | O(5)–Co(1)–N(2)  | 93.11(6) |
| N(1)–Co(1)–N(2)   | 92.71(7)   | O(5)–Co(1)–N(3B) | 86.89(6) |
| O(5A)–Co(1)–N(3B) | 86.89(6)   | N(1)–Co(1)–N(3B) | 87.29(7) |
| N(1A)–Co(1)–N(3B) | 87.29(7)   | N(2)–Co(1)–N(3B) | 180.0    |

Symmetry code A:  $-x, y, 0.5-z$ ; B:  $x, 1+y, z$ .

**1.4 Figure S1** The coordination mode of 2',7'-dichlorofluorescein ligands in Co-DCFB. Atoms are colored as follows: Co, cyan; Cl, green; O, red; C, gray; H, white.

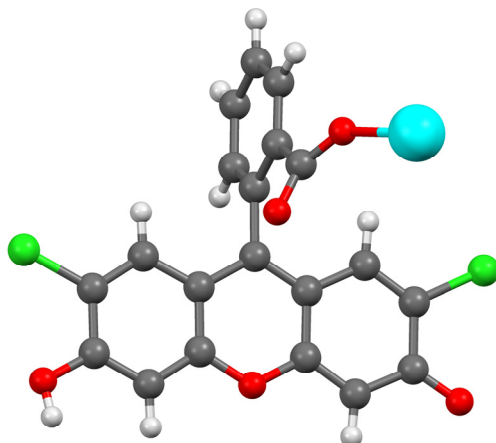

**1.5 Figure S2** The asymmetric unit of Co–DCFB. Atoms are colored as follows: Co, cyan; N, blue; Cl, green; O, red; C, gray; H, white. The hydrogen atoms of free solvent molecules were omitted for clarity.

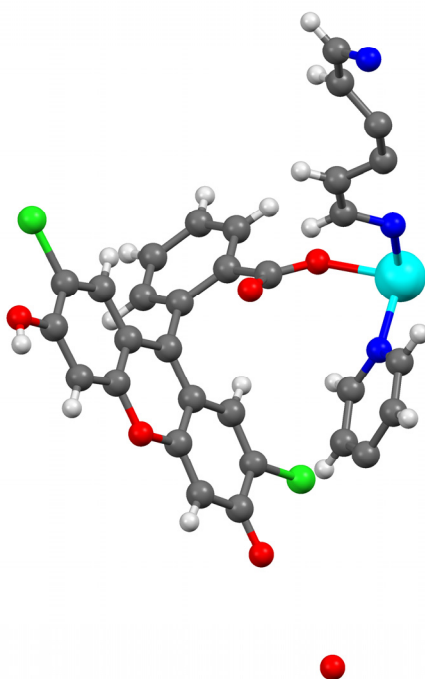

**1.6 Figure S3** TGA traces of Co-DCFB ranging from room temperature to 600 °C.

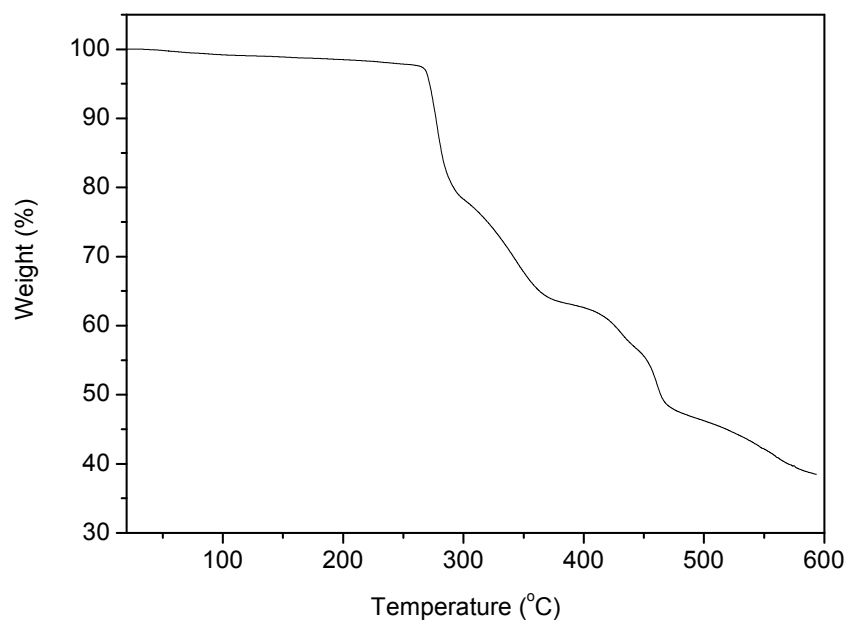

1.7 Figure S4 CO<sub>2</sub> adsorption/desorption isotherms of Co-DCFB at 195 K.

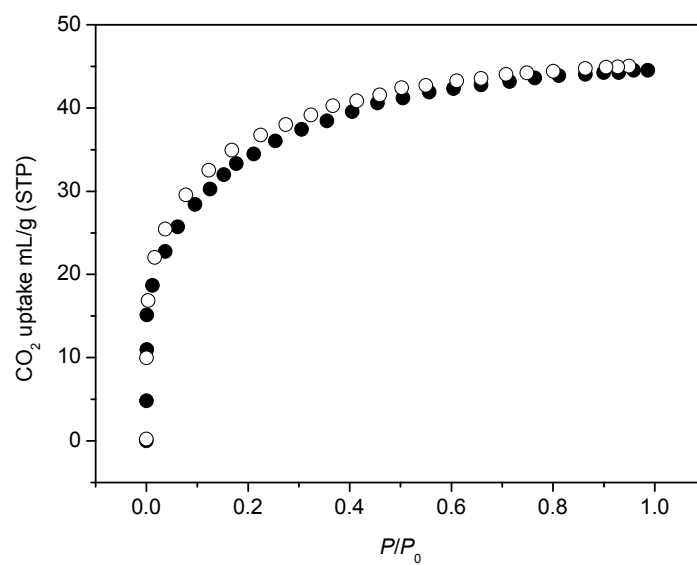

**1.8 Figure S5** The UV/vis absorption spectra for solid Co-DCFB.

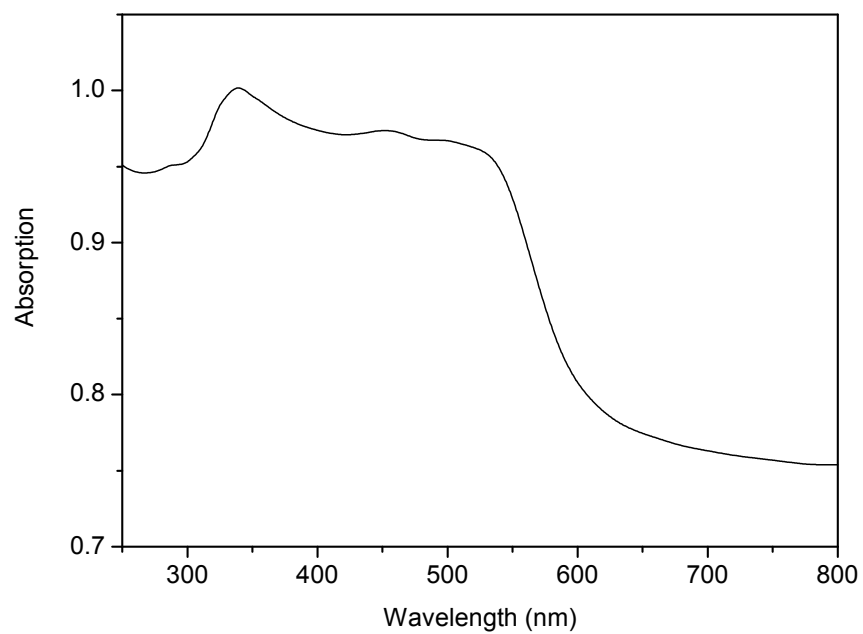

## 2. Photocatalysis and mechanism discussion.

**2.1 Figure S6** The emission spectrum of 0.1 mM 2',7'-dichlorofluorescein in acetonitrile solution when excited at 490 nm.

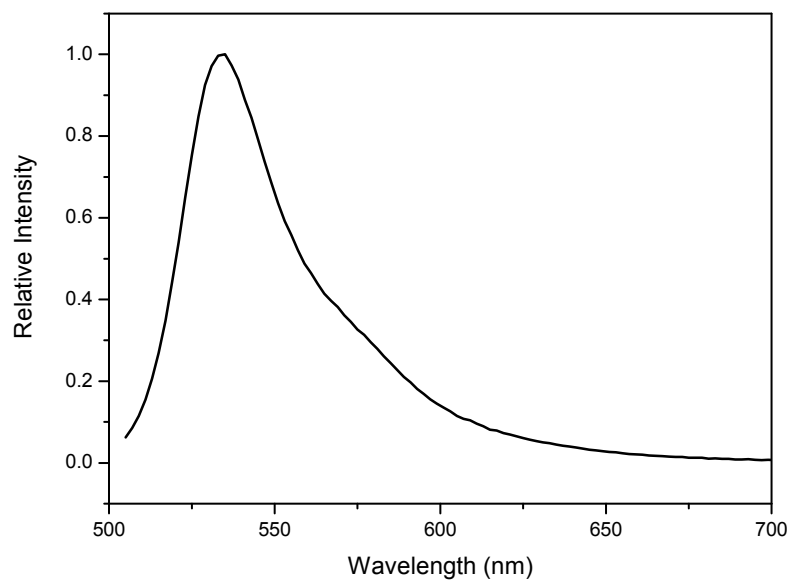



**2.2 Figure S7** The Stern–Volmer plot of Co–DCFB quenched by  $\text{NH}_4\text{SCN}$  acetonitrile solution, where  $I_0$  and  $I$  are the fluorescence intensity before and after  $\text{NH}_4\text{SCN}$  incorporation, respectively.

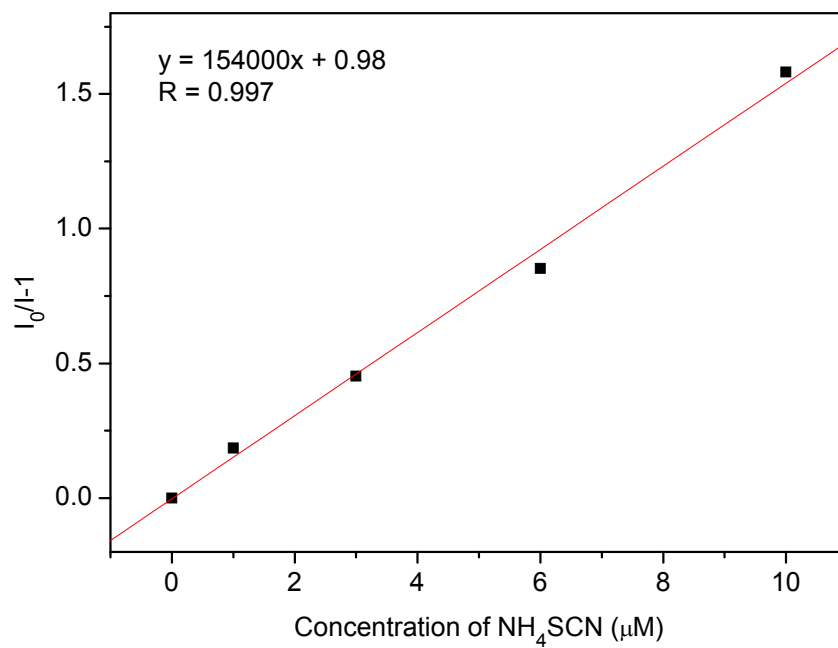

**2.3 Figure S8** Family of emission spectra of Co-DCFB suspension upon addition of compound  $\text{NH}_4\text{SCN}$  and  $\text{NH}_4\text{NO}_3$  up to  $1.4 \mu\text{M}$ , respectively.

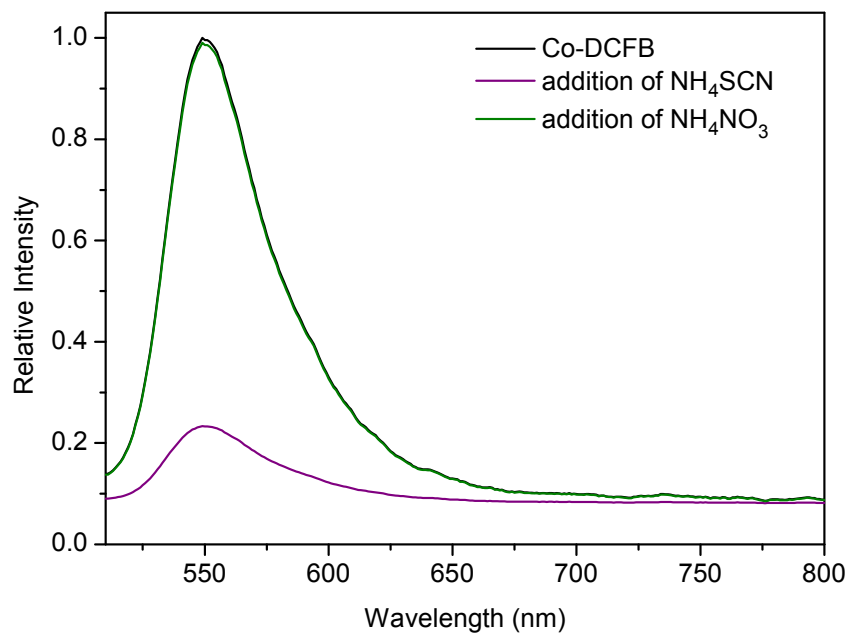

**2.4 Figure S9** EPR spectra of Co-DCFB after 3 hours of visible light irradiation in aerated CH<sub>3</sub>CN containing 50 mM DMPO (red line) and 50 mM DMPO, 60 mM NH<sub>4</sub>SCN and 50 mM styrene (black line).

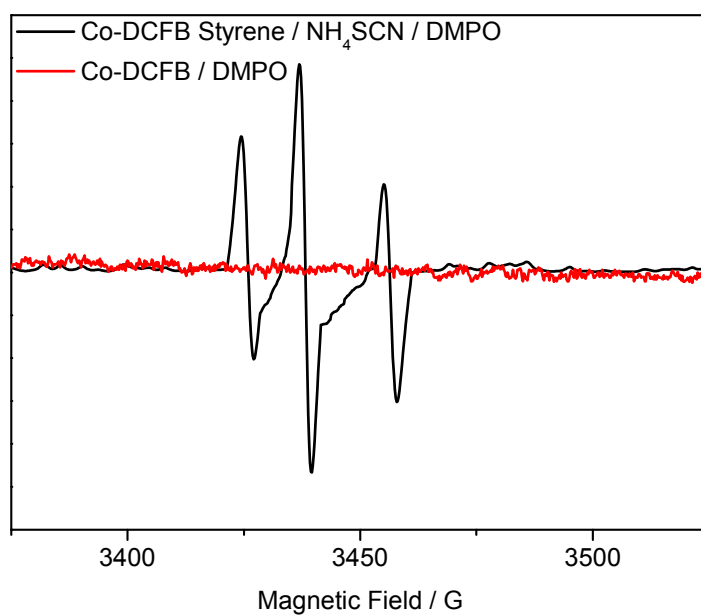

### 3. X-ray Crystallography of DCF-bpy.

#### 3.1 Crystal data of DCF-bpy:

$C_{52}H_{28}Cl_4N_2O_{12}$ , Mr = 1014.56, Triclinic, space group  $P-1$ ,  $a = 7.8397(9)$ ,  $b = 13.2138(16)$ ,  $c = 22.211(3)$  Å,  $\alpha = 89.955(3)$ ,  $\beta = 89.125(3)$ ,  $\gamma = 75.659(3)$ ,  $V = 2229.0(5)$  Å<sup>3</sup>,  $Z = 2$ ,  $D_c = 1.512$  g cm<sup>-3</sup>,  $\mu(\text{Mo-K}\alpha) = 0.71073$  mm<sup>-1</sup>,  $T = 200(2)$  K. 5223 unique reflections [ $R_{\text{int}} = 0.0946$ ]. Final  $R_I$ [with  $I > 2\sigma(I)$ ] = 0.0811,  $wR_2(\text{all data}) = 0.1911$ , GOOF = 1.064. CCDC number: 1884819.

**3.2 Figure S10** The asymmetric unit of **DCF-bpy**. Atoms are colored as follows: Cl, green; O, red; C, gray; N, blue; H, white.

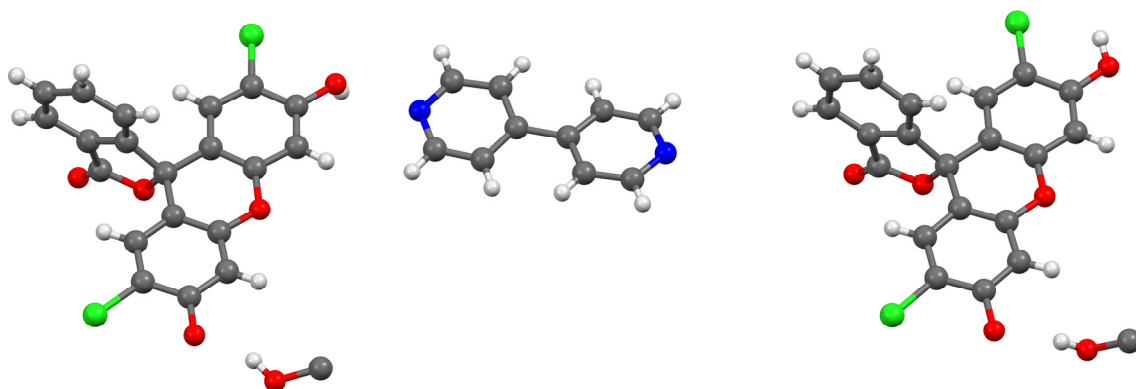

Supplement: d0qi00590h1.pdf [file d0qi00590h1.pdf]
